# Supplementary material for: Bioglues Based on an Elastin-Like Recombinamer: Effect of Tannic Acid as an Additive on Tissue Adhesion and Cytocompatibility
Source: MDPI journal article supplement (doi:10.3390/ijms24076776), 2023-04-05
Supplement: s1 [file s1]

## Supplementary Materials

### Bioglues Based on an Elastin-Like Recombinamer: Effect of Tannic Acid as an Additive on Tissue Adhesion and Cytocompatibility

Alp Sarisoy <sup>1,†</sup>, Sergio Acosta <sup>1,†</sup>, José Carlos Rodríguez-Cabello <sup>2</sup>, Phillip Czichowski <sup>3</sup>, Alexander Kopp <sup>3</sup>, Stefan Jockenhoevel <sup>1,4,\*</sup> and Alicia Fernández-Colino <sup>1,\*</sup>

<sup>1</sup> Department of Biohybrid & Medical Textiles (BioTex), AME–Institute of Applied Medical Engineering, Helmholtz Institute, RWTH Aachen University, D-52074 Aachen, Germany

<sup>2</sup> Bioforge Lab, Group for Advanced Materials and Nanobiotechnology, Biomedical Networking Research Center of Bioengineering, Biomaterials and Nanomedicine (CIBER-BBN), Edificio LUCIA, Universidad de Valladolid, 47011, Valladolid, Spain

<sup>3</sup> Fibrothelium GmbH, D-52068 Aachen, Germany

<sup>4</sup> AMIBM-Aachen-Maastricht-Institute for Biobased Materials, Faculty of Science and Engineering, Brightlands Chemelot Campus, Maastricht University, 6167 RD Geleen, The Netherlands

\* Correspondence: jockenhoevel@ame.rwth-aachen.de (S.J.); fernandez@ame.rwth-aachen.de (A.F.-C.); Tel.: +49-241-80-47478 (S.J.); +49-241-80-47470 (A.F.-C.)

† These authors contributed equally to this work.

**Table S1.** Adhesive strength (expressed as mean  $\pm$  SD) of different bioadhesive formulation, differing the ELR concentration, as represented in Figure 2b.

| Formulation        | Adhesive strength (kPa) |
|--------------------|-------------------------|
| 10% TA             | 0.0 $\pm$ 0.0           |
| 1.25% ELR + 10% TA | 0.0 $\pm$ 0.0           |
| 2.5% ELR + 10% TA  | 0.0 $\pm$ 0.0           |
| 5% ELR + 10% TA    | 4.4 $\pm$ 2.0           |
| 10% ELR + 10% TA   | 33.8 $\pm$ 12.9         |
| 20% ELR + 10% TA   | 38.1 $\pm$ 18.9         |

**Table S2.** Adhesive strength (expressed as mean  $\pm$  SD) of different bioadhesive formulation, differing the TA concentration, as represented in Figure 2c

| <b>Formulation</b> | <b>Adhesive strength<br/>(kPa)</b> |
|--------------------|------------------------------------|
| 10% ELR            | 88.8 $\pm$ 33.2                    |
| 10% ELR + 5% TA    | 9.0 $\pm$ 2.1                      |
| 10% ELR + 10% TA   | 33.8 $\pm$ 12.9                    |
| 10% ELR + 20% TA   | 27.4 $\pm$ 7.1                     |
| 10% ELR + 40% TA   | 20.0 $\pm$ 4.5                     |

**Table S3.** Adhesive strength of the bioadhesive formulations along time, (10, 20, 40 and 60 min), as presented in Figure 2d.

| <b>Formulation</b>      | <b>Time (min)</b> |                 |                 |                 |
|-------------------------|-------------------|-----------------|-----------------|-----------------|
|                         | <b>10</b>         | <b>20</b>       | <b>40</b>       | <b>60</b>       |
| <b>10% ELR + 10% TA</b> | 0.0 $\pm$ 0.0     | 16.0 $\pm$ 5.9  | 40.7 $\pm$ 17.3 | 33.8 $\pm$ 12.9 |
| <b>10% ELR</b>          | 0.0 $\pm$ 0.0     | 17.1 $\pm$ 18.3 | 34.5 $\pm$ 27.8 | 88.8 $\pm$ 33.2 |
| <b>10% TA</b>           | 0.0 $\pm$ 0.0     | 0.0 $\pm$ 0.0   | 0.0 $\pm$ 0.0   | 0.0 $\pm$ 0.0   |

**Table S4.** Failure types of the bioadhesive formulations. The images show the appearance of the porcine bone samples after adhesion tests.

| Formulation      | Images                                                                              | Failure type |
|------------------|-------------------------------------------------------------------------------------|--------------|
| 5% ELR + 10% TA  | 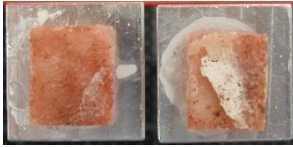   | Adhesion     |
| 10% ELR + 10% TA |    | Adhesion     |
| 20% ELR + 10% TA |    | Adhesion     |
| 10% ELR + 5% TA  |    | Adhesion     |
| 10% ELR + 20% TA |   | Adhesion     |
| 10% ELR + 40% TA |  | Adhesion     |

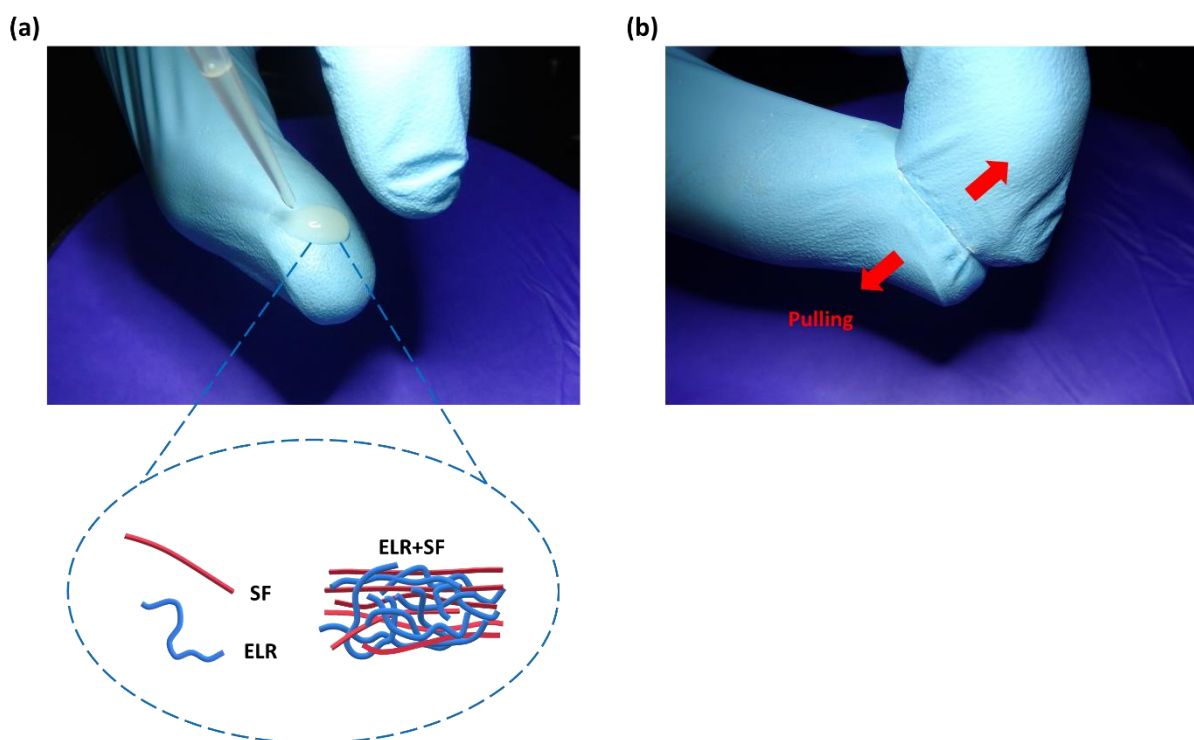

**Figure S1.** The appearance of ELR+SF bioadhesive. (a) Picture of ELR+SF bioadhesive deposited on the gloves. (b) Picture of the ELR+SF at the interface of the gloves while pulling.

**Table S5.** Comparison of adhesive formulations in similar studies.

| Name of the adhesive  | Composition                                                                                                                               | Tensile test           | Animal tissue                                    | Mechanical values                                                          | Curing time | Ref.                        |
|-----------------------|-------------------------------------------------------------------------------------------------------------------------------------------|------------------------|--------------------------------------------------|----------------------------------------------------------------------------|-------------|-----------------------------|
| Composite bioadhesive | Elastin-like recombinamers and silk fibroin                                                                                               | Pull-off               | Porcine skin                                     | 17.6 kPa                                                                   | 1 h         | Present study               |
|                       |                                                                                                                                           |                        | Porcine bone                                     | 123.3 kPa                                                                  | 1 h         |                             |
| SFT                   | Silk fibroin and tannic acid                                                                                                              | Lap shear              | Porcine skin                                     | 134.1 kPa                                                                  | 20 min      | (Bai et al., 2019)          |
| TASK                  | Silk fibroin and tannic acid                                                                                                              | Lap shear              | Rabbit skin                                      | ~10 kPa                                                                    | 20 min      | (Gao et al., 2020)          |
| SF@TA@HA              | Silk fibroin, tannic acid and hydroxyapatite                                                                                              | Three-point bending    | Porcine bone                                     | 922.8 kPa                                                                  | 35 min      | (Bai et al., 2020)          |
| (Ca)-modified SF      | Calcium-modified silk fibroin                                                                                                             | Peeling                | Porcine skin                                     | ~400 N/m                                                                   | 24 h        | (Seo et al., 2018)          |
| TAPTRA                | Tannic acid primed thermally-responsive polymers (gelatin, and poly (NIPAM-co-BA))                                                        | Pull-off               | Porcine skin                                     | ~15 J/m <sup>2</sup> (gelatin), ~200 J/m <sup>2</sup> (poly (NIPAM-co-BA)) | X           | (Li et al., 2020)           |
| Cat-ELP               | Catechol-modified elastin-like polypeptides                                                                                               | Pull-off and lap shear | Porcine skin                                     | 37 kPa (pull-off) and 39 kPa (lap shear)                                   | 12-13 h     | (Desai et al., 2020)        |
| YKV and mYKV          | DOPA-modified elastin-like polypeptides combined with crosslinkers (iron(III) nitrate, sodium periodate and tris(hydroxymethyl)phosphine) | Lap shear              | Porcine skin                                     | 14.7 – 26.7 kPa                                                            | 24 h        | (Hollingshead et al., 2021) |
| SUP glue              | Super charged elastin-like polypeptides and sodium dodecylbenzene sulfonate                                                               | Lap shear              | Porcine skin                                     | 6 J/m <sup>2</sup>                                                         | 1 h         | (Ma et al., 2021)           |
| TAPE                  | Tannic acid, and poly(ethylene glycol)                                                                                                    | Pull-off               | Porcine skin                                     | ~180 kPa                                                                   | 1 min       | (Kim et al., 2015)          |
| PAAm-TA-KA            | Polyacrylamide-tannic acid-kaolin hydrogels                                                                                               | Lap shear              | Porcine skin                                     | 480 kPa                                                                    | 30 min      | (Fan et al., 2020)          |
| TNA hydrogel          | Tannic acid and DNA hydrogel                                                                                                              | Lifting                | Rat subcutaneous tissue                          | ~240 mg of tissue lifting                                                  | 10 min      | (M. Shin et al., 2015)      |
| HA-CA hydrogel        | Catechol-modified hyaluronic acid                                                                                                         | Pull-off               | Rat liver                                        | 1.4 kPa                                                                    | 10 min      | (J. Shin et al., 2015)      |
| GelMA-TA hydrogels    | Gelatin methacrylate hydrogels and tannic acid                                                                                            | Lap shear              | Porcine skin                                     | 81 kPa                                                                     | 1 min       | (Liu et al., 2018)          |
| Gel-TA                | Gelatin crosslinked with tannic acid silver nitrate                                                                                       | Lap shear              | Decellularized porcine small intestine submucosa | 16.6 - 52.8 kPa                                                            | X           | (Guo et al., 2018)          |

## References:

- Bai, S., Zhang, X., Cai, P., Huang, X., Huang, Y., Liu, R., Zhang, M., Song, J., Chen, X., & Yang, H. (2019). A silk-based sealant with tough adhesion for instant hemostasis of bleeding tissues. *Nanoscale Horizons*, 4(6), 1333–1341. <https://doi.org/10.1039/c9nh00317g>
- Bai, S., Zhang, X., Lv, X., Zhang, M., Huang, X., Shi, Y., Lu, C., Song, J., & Yang, H. (2020). Bioinspired Mineral–Organic Bone Adhesives for Stable Fracture Fixation and Accelerated Bone Regeneration. *Advanced Functional Materials*, 30(5). <https://doi.org/10.1002/adfm.201908381>
- Desai, M. S., Chen, M., Hong, F. H. J., Lee, J. H., Wu, Y., & Lee, S. W. (2020). Catechol-Functionalized Elastin-like Polypeptides as Tissue Adhesives. *Biomacromolecules*, 21(7), 2938–2948. <https://doi.org/10.1021/acs.biomac.0c00740>
- Fan, X., Wang, S., Fang, Y., Li, P., Zhou, W., Wang, Z., Chen, M., & Liu, H. (2020). Tough polyacrylamide-tannic acid-kaolin adhesive hydrogels for quick hemostatic application. *Materials Science and Engineering C*, 109. <https://doi.org/10.1016/j.msec.2020.110649>
- Gao, X., Dai, Q., Yao, L., Dong, H., Li, Q., & Cao, X. (2020). A medical adhesive used in a wet environment by blending tannic acid and silk fibroin. *Biomaterials Science*, 8(9), 2694–2701. <https://doi.org/10.1039/d0bm00322k>
- Guo, J., Sun, W., Kim, J. P., Lu, X., Li, Q., Lin, M., Mrowczynski, O., Rizk, E. B., Cheng, J., Qian, G., & Yang, J. (2018). Development of tannin-inspired antimicrobial bioadhesives. *Acta Biomaterialia*, 72, 35–44. <https://doi.org/10.1016/j.actbio.2018.03.008>
- Hollingshead, S., Torres, J. E., Wilker, J. J., & Liu, J. C. (2021). Effect of Cross-Linkers on Mussel- and Elastin-Inspired Adhesives on Physiological Substrates. *ACS Applied Bio Materials*. <https://doi.org/10.1021/acsabm.1c01095>
- Kim, K., Shin, M., Koh, M. Y., Ryu, J. H., Lee, M. S., Hong, S., & Lee, H. (2015). TAPE: A medical adhesive inspired by a ubiquitous compound in plants. *Advanced Functional Materials*, 25(16), 2402–2410. <https://doi.org/10.1002/adfm.201500034>
- Li, B., Whalen, J. J., Humayun, M. S., & Thompson, M. E. (2020). Reversible Bioadhesives Using Tannic Acid Primed Thermally-Responsive Polymers. *Advanced Functional Materials*, 30(5). <https://doi.org/10.1002/adfm.201907478>
- Liu, B., Wang, Y., Miao, Y., Zhang, X., Fan, Z., Singh, G., Zhang, X., Xu, K., Li, B., Hu, Z., & Xing, M. (2018). Hydrogen bonds autonomously powered gelatin methacrylate hydrogels with super-elasticity, self-heal and underwater self-adhesion for sutureless skin and stomach surgery and E-skin. *Biomaterials*, 171, 83–96. <https://doi.org/10.1016/j.biomaterials.2018.04.023>
- Ma, C., Sun, J., Li, B., Feng, Y., Sun, Y., Xiang, L., Wu, B., Xiao, L., Liu, B., Petrovskii, V. S., Bin Liu, Zhang, J., Wang, Z., Li, H., Zhang, L., Li, J., Wang, F., Göstl, R., Potemkin, I. I., ... Herrmann, A. (2021). Ultra-strong bio-glue from genetically engineered polypeptides. *Nature Communications*, 12(1). <https://doi.org/10.1038/s41467-021-23117-9>
- Seo, J. W., Kim, H., Kim, K. H., Choi, S. Q., & Lee, H. J. (2018). Calcium-Modified Silk as a Biocompatible and Strong Adhesive for Epidermal Electronics. *Advanced Functional Materials*, 28(36). <https://doi.org/10.1002/adfm.201800802>
- Shin, J., Lee, J. S., Lee, C., Park, H. J., Yang, K., Jin, Y., Ryu, J. H., Hong, K. S., Moon, S. H., Chung, H. M., Yang, H. S., Um, S. H., Oh, J. W., Kim, D. I., Lee, H., & Cho, S. W. (2015). Tissue Adhesive Catechol-Modified Hyaluronic Acid Hydrogel for Effective, Minimally Invasive Cell Therapy. *Advanced Functional Materials*, 25(25), 3814–3824. <https://doi.org/10.1002/adfm.201500006>
- Shin, M., Ryu, J. H., Park, J. P., Kim, K., Yang, J. W., & Lee, H. (2015). DNA/tannic acid hybrid gel exhibiting biodegradability, extensibility, tissue adhesiveness, and hemostatic ability. *Advanced Functional Materials*, 25(8), 1270–1278. <https://doi.org/10.1002/adfm.201403992>
